# Supplementary figures and images for: An electrochemiluminescence microsensor based on DNA-silver nanoclusters amplification for detecting cellular adenosine triphosphate
Source: Royal Society of Chemistry journal article supplement (doi:10.1039/d4ay00212a), 2024-01-01

(A)

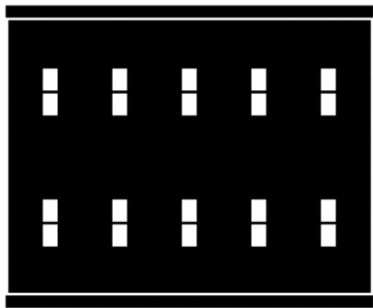

(B)

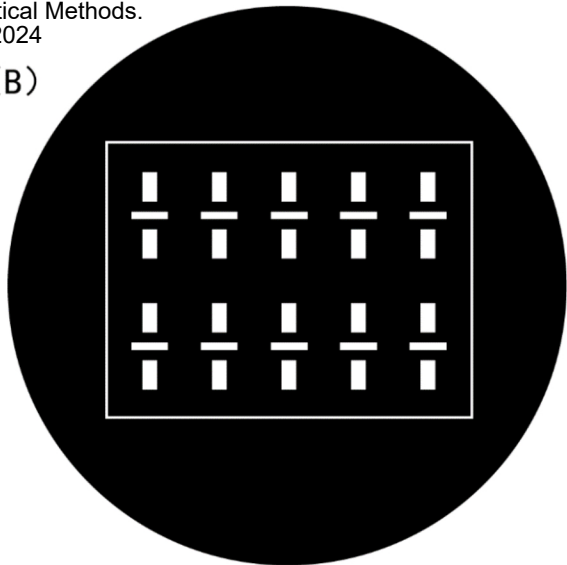

Supplement: d4ay00212a3.pdf [file d4ay00212a3.pdf]

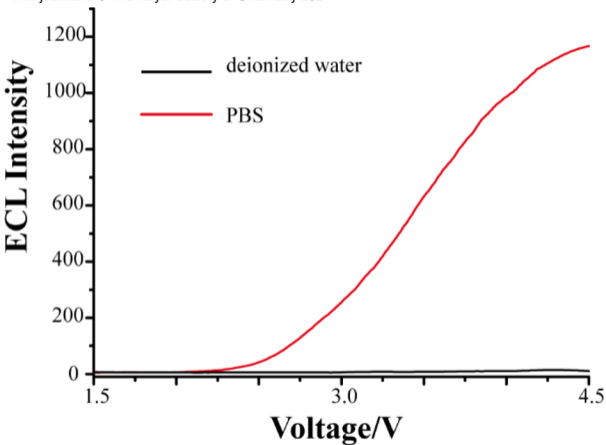

Supplement: d4ay00212a4.pdf [file d4ay00212a4.pdf]
